# Supplementary material for: Upfront DPYD Genotyping and Toxicity Associated with Fluoropyrimidine-Based Concurrent Chemoradiotherapy for Oropharyngeal Carcinomas: A Work in Progress
Source: MDPI journal article supplement (doi:10.3390/curroncol29020045), 2022-01-26
Supplement: s1 [file s1]

# Supplementary Materials

**Table S1.** Patient Clinical and Laboratory Severe Toxicities (grade  $\geq 3$ ) <sup>†</sup>

| Adverse events                                     | Pre-DPYD*2A genotyping patients<br>(n = 87) | Post-DPYD*2A genotyping patients<br>(n = 86) | p     |
|----------------------------------------------------|---------------------------------------------|----------------------------------------------|-------|
| Patients with available longitudinal toxicity data | 100% (n = 87)                               | 100% (n = 86)                                | N/A   |
| <i>Mucositis</i>                                   | 54% (n = 47)                                | 47% (n = 40)                                 | 0.32  |
| Overall severe toxicity                            | 71% (n = 62)                                | 62% (n = 53)                                 | 0.18  |
| Clinical toxicity                                  |                                             |                                              |       |
| <i>Dysphagia</i>                                   | 39% (n = 34)                                | 26% (n = 22)                                 | 0.058 |
| Pharyngolaryngeal pain                             | 9% (n = 8)                                  | 14% (n = 12)                                 | 0.32  |
| Pneumonia (including aspiration events)            | 1% (n = 1)                                  | 5% (n = 4)                                   | 0.17  |
| <i>Radiation-induced dermatitis</i>                | 15% (n = 13)                                | 13% (n = 11)                                 | 0.68  |
| Xerostomia                                         | 1% (n = 1)                                  | 2% (n = 2)                                   | 0.55  |
| Cellulitis                                         | 1% (n = 1)                                  | 2% (n = 2)                                   | 0.55  |
| Laboratory toxicities                              |                                             |                                              |       |
| <i>Neutropenia</i>                                 | 8% (n = 7)                                  | 9% (n = 8)                                   | 0.77  |
| Thrombocytopenia                                   | 5% (n = 5)                                  | 5% (n = 4)                                   | 0.75  |
| Anemia                                             | 4% (n = 4)                                  | 2% (n = 2)                                   | 0.41  |

In *italic type*: patient clinical and laboratory adverse events most likely related to 5-FU administration. <sup>†</sup> Severe toxicities reported in more than 1% of patients

**Table S2.** Medical Interventions Indicated for Previously Reported Toxicities.

| Adverse events                                     | Pre-DPYD*2A genotyping patients<br>(n = 87) | Post-DPYD*2A genotyping patients<br>(n = 86) | p    |
|----------------------------------------------------|---------------------------------------------|----------------------------------------------|------|
| Patients with available longitudinal toxicity data | 100% (n = 87)                               | 100% (n = 86)                                | N/A  |
| Patients requiring hospitalization                 |                                             |                                              |      |
| $\geq 1$ hospitalization                           | 29% (n = 25)                                | 23% (n = 20)                                 | 0.41 |

|                               |                                      |                      |      |
|-------------------------------|--------------------------------------|----------------------|------|
| Median duration (days)        | 3                                    | 6                    | N/A  |
|                               | Patients requiring special treatment |                      |      |
| Enteral feeding               | 41% ( <i>n</i> = 36)                 | 33% ( <i>n</i> = 28) | 0.23 |
| Antibiotics                   | 13% ( <i>n</i> = 11)                 | 14% ( <i>n</i> = 12) | 0.80 |
| ≥ 1 blood product transfusion | 3% ( <i>n</i> = 2)                   | 0% ( <i>n</i> = 0)   | 0.16 |

**Table S3.** Individual Descriptive Data for Consecutive Patients Identified with DPYD Polymorphisms.

| Patient ID                        | 1                                              | 2               | 3                    | 4                                             | 5                                              | 6                                  | 7                                          | 8                           |
|-----------------------------------|------------------------------------------------|-----------------|----------------------|-----------------------------------------------|------------------------------------------------|------------------------------------|--------------------------------------------|-----------------------------|
|                                   | DPYD polymorphism                              |                 |                      |                                               |                                                |                                    |                                            |                             |
| DPYD*2A mutation                  | Yes                                            | Yes             | No                   | No                                            | No                                             | No                                 | No                                         | No                          |
| Other DPYD variants               | No                                             | No              | c.2846A><br>T        | c.2846A><br>T                                 | c.1236G><br>A                                  | c.1236G><br>A                      | c.1236G><br>A                              | c.1236G><br>A               |
|                                   | Patient baseline characteristics               |                 |                      |                                               |                                                |                                    |                                            |                             |
| Age (years)                       | 56                                             | 61              | 73                   | 59                                            | 40                                             | 52                                 | 63                                         | 50                          |
| Sex                               | M                                              | M               | M                    | M                                             | M                                              | F                                  | F                                          | M                           |
| Smoking status                    | Past                                           | Never           | Past                 | Past                                          | Past                                           | Past                               | Past                                       | Never                       |
| HSV status                        | HSV1+                                          | HSV1+           | HSV1+                | Unknown                                       | HSV1+                                          | Unknown                            | Unknown                                    | Unknown                     |
| p16 antigen status                | ?                                              | HPV+            | HPV+                 | HPV+                                          | HPV+                                           | HPV+                               | HPV+                                       | HPV+                        |
| Staging (Tx Nx M0)                | T4a N1<br>(IVA)                                | T2 N2c<br>(IVA) | T1 N3<br>(IVB)       | T3 N2b<br>(IVA)                               | T2 N2b<br>(IVA)                                | T2 N2b<br>(IVA)                    | T2 N2c<br>(IVA)                            | T1 N2b<br>(IVA)             |
|                                   | Lung ade-<br>noCA (re-<br>sected)<br>HTN       |                 |                      |                                               |                                                |                                    |                                            |                             |
| Comorbidities (descriptive)       | HTN                                            | None            | Reflux<br>Renal cyst | None                                          | None                                           | Osteop.                            | None                                       | None                        |
|                                   | Treatment characteristics                      |                 |                      |                                               |                                                |                                    |                                            |                             |
| Chemoradiotherapy regimen         | Cisplatin                                      | Cisplatin       | Carbo 5-<br>FU       | Carbo 5-<br>FU                                | Carbo 5-<br>FU                                 | Carbo 5-<br>FU                     | Carbo 5-<br>FU                             | Carbo 5-<br>FU              |
| Number of 5-FU cycles completed   | N/A                                            | N/A             | 3                    | 2                                             | 2                                              | 2                                  | 3                                          | 3                           |
|                                   | Treatment toxicities and medical interventions |                 |                      |                                               |                                                |                                    |                                            |                             |
| Grade ≥3 toxicities (descriptive) | No                                             | No              | Mucositis<br>Thromb. | Mucositis<br>Dyspha-<br>gia<br>PLP<br>Xerost. | Mucositis<br>Dyspha-<br>gia<br>PLP<br>Neutrop. | Mucositis<br>Dyspha-<br>gia<br>PLP | Mucositis<br>Aspira-<br>tion<br>Cellulitis | Mucositis<br>Dyspha-<br>gia |

|                               |     |     |     |         |            |     |           |     |
|-------------------------------|-----|-----|-----|---------|------------|-----|-----------|-----|
|                               |     |     |     | Aspira- | Feb. neut. |     |           |     |
|                               |     |     |     | tion    |            |     |           |     |
| Enteral feeding               | No  | No  | No  | Yes     | Yes        | No  | No        | Yes |
| Other treatment (descriptive) | No  | No  | No  | No      | Antibiot-  | No  | Antibiot- | No  |
|                               |     |     |     |         | ics        |     | ics       |     |
|                               |     |     |     |         | G-CSF      |     |           |     |
| Hospitalization               | No  | No  | No  | No      | Yes        | No  | Yes       | No  |
| Duration (days)               | N/A | N/A | N/A | N/A     | 5          | N/A | 4         | N/A |

### Abbreviations

HTN: hypertension

PLP: pharyngolaryngeal pain

Neutrop: neutropenia

G-CSF: growth colony stimulating factor

Thromb: thrombocytopenia

Xerost: xerostomia

Feb. neut.: febrile neutropenia

Osteop.: osteoporosis
